# Supplementary material for: Field Investigations of Coastal Sea Surface Temperature Drop after Typhoon Passages
Source: Copernicus journal article supplement (doi:10.5194/essd-2018-127), 2018-10-22
Supplement: Supplementary file [file essd-2018-127-AC1-supplement.pdf]

## Reply to Anonymous Referee #1

### Overall Comments:

The reviewer thought the data analysis presented in the manuscript is superficial and inconclusive and had no effort to perform a detailed analysis with e.g. standard regression techniques that can underpin correlation between the SST drops and other environmental conditions. The reviewer thought this manuscript only speculate on possible mechanisms without presenting robust and sufficiently clear evidence to explain mechanisms responsible for the observed sea surface temperature anomalies.

### Overall reply:

The aim of the journal Earth System Science Data (ESSD) that this manuscript submitted is to publish the articles on original research data (sets), furthering the reuse of high-quality data of benefit to Earth system sciences. We think our manuscript have satisfied with this aim.

We have published the coastal SST data (and corresponding data used in this manuscript) on the Data Center PANGAEA which suggested by ESSD and shown the link DOI in the manuscript which ESSD asked. The coastal SST drop data are rare and valuable especially under the typhoon conditions. This phenomena is found near the coast (0.6 km to coastline) at the Kuroshio edge. Kuroshio cold water intrusion to the continental shelf was recently reported (Zhou et al., 2018; Yang et al., 2018). The dataset presented in this manuscript can provide more evidences (from field measurements) to have better understandings on the mechanisms.

We don't fully agree with the reviewer's comments on that the manuscript is superficial and inconclusive. For data quality, we have shown the instrumentations, sampling methods, sensor calibration, and the data quality check methods (Sections 2.2 and 2.3). Maybe the data quality processes was not shown sufficiently in the original manuscript, we have added more detail description. The data used in this study (from marine data buoy) was cross-compared with various types of instruments (Figure 2) to show more confidence on the data obtained. The reviewer mentioned there is no effort to perform a detailed analysis with e.g. standard regression techniques that can underpin correlation between the SST drops and other environmental conditions. Actually we have done. The results are shown in line 23-24 of page 12 and line 19-20 of page 13 in the original manuscript. We thought to publish the datasets is more crucial for ESSD therefore we didn't show the figures. Now we add them to the revised manuscript. Please see in Figure 5(a)(b) and Figure 7.

This manuscript reports the SST drop phenomena from field measurement. We collect and analyze extensive datasets (from buoys, tide stations, ADCPs and satellite images) and try figure out the potential mechanism of coastal SST drop. We think this manuscript contributes to proof that the Kuroshio cold water intrusion to the continental shelf.

We have revised the manuscript and marked the revisions by blue color.

**Specific comments from the reviewer 1 and the replies:**

1. In the abstract, the authors states that an extensive data analysis is presented. However, this extensive analysis is not supported by any of the figures in the manuscript.

**Reply:**

The conclusions presented in this study (significant SST drop at the coastal ocean after typhoon passage occurs and it is assumed due to the Kuroshio subsurface cold water intrusion to the continental shelf) depends on the qualified field data and their statistics (Section 2.2, 2.3 and Section 4), correlation and discussions with the typhoon parameters (Section 5.1.1 and 5.1.2) and the proofs of current profile (Sec 5.1 & Figure 9) and drop time lag (Table 4). The regression results which originally didn't shown in the manuscript are now added. Please find in Figure 5(a)(b) and Figure 7.

2. The authors collected a huge and comprehensive data set of sea surface temperature, wave parameters, atmospheric conditions, etc... and yet there is no attempt to correlate the sea surface temperature with any other environmental variables.

**Reply:**

In section 5.1, we discussed about typhoon dependence with the respect of coastal SST drop, we learned qualitatively the coastal SST drop is not related to typhoon central air pressure and typhoon central wind speed as well as typhoon moving speed, but typhoon track. Actually we also did the quantitative regression with typhoon parameters and have shown the coefficients of determination in the original submitted manuscript. In the revised manuscript, we show the figures. Please see Figure 5(a)(b) and Figure 7.

This result partially confirmed that the coastal SST drop is not highly related

environmental variables, leading us not to invest time on correlating coastal SST drop with every environmental variables; instead, putting more efforts on where and how the cold water intrude. This result also leading us to believe that those environmental variables can't induce such a significant drop in SST, unless there is a cold water intrusion. That's why we focused more on where and how the cold water intrude in this study as written in section 5.2 and 5.3.

3. ADCP's seem to collect sea surface temperature too as shown in figure 2. However, measuring SST is not mentioned as a capability of the ADCP in section 2.2.3.

**Reply:**

We added a description in the section 2.2.2 that ADCP is capable to measure water temperature and also being collected in this study. Since 2.2.3 is describing about current data, section 2.2.2 is more suitable for describing anything related water temperature data.

4. Satellite images were collected for this study, but it seems they were analysed.

**Reply:**

Yes, they are one-day averaged SST images. They are from the advanced very high resolution radiometer, moderate imaging spectroradiometer's Terra and Aqua, and advanced microwave spectroradiometer-EOS instruments to produce the 1-km global SST maps, done by NOAA.

5. Section 2.3 on quality control is potentially interesting. However, the description of quality check is too general. What data did the authors remove? Why? What were the criteria or thresholds for quality control? Much more details are required for the reader to understand the procedure.

**Reply:**

More description have added in Section 2.3. For detail of the meteo-oceanographic data quality check, please refer to Doong et al. (2007).

Doong, D. J., Chen, S. H., Kao, C. C., and Lee, B. C.: Data quality check procedures of an operational coastal ocean monitoring network, *Ocean Eng.*, 34, 234-246, <https://doi.org/10.1016/j.oceaneng.2006.01.011>, 2007.

6. Figure 2 shows the comparison of SST time series at different instrumentations and it is used to claim that the drops are a consistent feature. However, I do not see how figure 2 can fit the quality check section.

**Reply:**

Figure 2 show the simultaneous observations of SST drop obtained from 3 different kinds of instrument, illustrating the significant coastal SST drop is not due to instrumental error but a nature phenomenon. All the data from 3 different instrumentations satisfied with the quality check criteria. They are reasonable data (within instrument measurement range and in reasonable environmental range) and the time series is in continuous changes.

7. There is an unnecessary repetition of data being archived on pangaea.

**Reply:**

This is necessary to show the DOI of the dataset in the manuscript, asked by ESSD.

8. Section 4 on statistics of SST drops is quite misleading. About 2/3 of the section is not related to statistical properties. The remaining part (section 4.3) is just a simplistic description of average values, and it is far from being a rigorous statistical analysis

**Reply:**

We planned to show the statistics of coastal SST drops, for example the mean and max. SST drop, the cooling rate, and the drop and recovery durations. We think the numbers will be very high interested by physical oceanographers. To find the statistics, it is necessary to determinate the correct starting and ending drop time which shown in Section 4.1. We think the contents and results are sufficient to express our findings. If possible, we hope the reviewer to suggest clearly the contents of “rigorous statistical analysis”.

9. Section 5 is too general and inconclusive. There is an attempt to correlate SST drops with typhoon characteristics such as intensity, but this is done in relation to typhoon categories only. It would be much more meaningful to present scatter

plots of SST drops against environmental parameters, such as wind speed, wave height, pressure, etc.. and then perform machine learning or regression analysis to find correlations, trends etc. The same comments apply for sections 5.1.1, 5.1.2 and 5.1.3. In the present form, these subsections are supported by inconclusive figures that only allow authors to speculate on possible causes, without suggesting a feasible and well supported explanation for SST drops.

**Reply:**

Please refer to our replies for comment 2.

We would like to emphasize that we focused more on detecting where and how the cold water intrusion. In section 5.2 and 5.3, we concluded that typhoon induced southward alongshore winds generating Ekman transport and Kuroshio water intrusion, resulting a massive coastal SST drop. This mechanism is confirmed by field data in figure 6 and 7.

10. Another example of speculative discussion is the one in section 5.2. The authors analyse the influence of ocean current on the SST drops, but the only supporting figures are figure 7 and 8. How can a reader infer a correlation between the observed SST drops and current from a plot of bathymetry with overlaid arrows or current directions?

**Reply:**

Note: Figure 7 and 8 in original manuscript are Figure 9 and 10 in the revised manuscript.

The whole story of potential mechanism of coastal SST drop starts from wind data (in Figure 8) with current profile data afterwards (Figure 9). These two figures confirmed that coastal upwelling is the potential mechanism of significant coastal SST drop. The time lag analysis of SST drops in several stations (shown in Table 4) provides preliminary result of the propagation path of the cold water. Figure 10 was plotted to suggest the movement path of cold water.

11. Overall, I feel the manuscript misses the extensive data analysis promised in the abstract, making the discussion speculative and the manuscript inconclusive.

**Reply:**

Thanks for the reviewer's comments.

We accept part of the reviewer's comments and have made revisions or added new figures, but we don't fully agree with the overall assessment. We think the manuscript satisfies with ESSD's goal and will contribute to have more understanding on the Kuroshio's intrusion to the continental shelf. Since the study area is near Taiwan but similar phenomenon may occur in the other coastal areas.
